# Supplementary material for: Sensitive electrochemical sensor based on nickel/PDDA/reduced graphene oxide modified screen-printed carbon electrode for nitrite detection
Source: Royal Society of Chemistry journal article supplement (doi:10.1039/d2ra03918d), 2022-01-01
Supplement: d2ra03918d1.pdf [file d2ra03918d1.pdf]

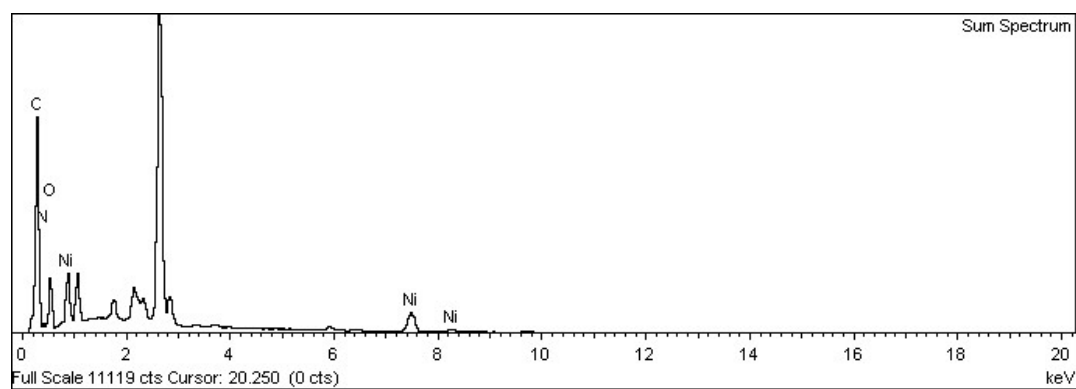

| Element | Weight% | Atomic% |
|---------|---------|---------|
| C K     | 55.11   | 71.27   |
| N K     | 5.05    | 5.60    |
| O K     | 17.83   | 17.31   |
| Ni K    | 22.01   | 5.82    |
| Totals  | 100.00  |         |

**Fig. S1.** EDX spectrum of Ni/PDDA/rGO/SPCE

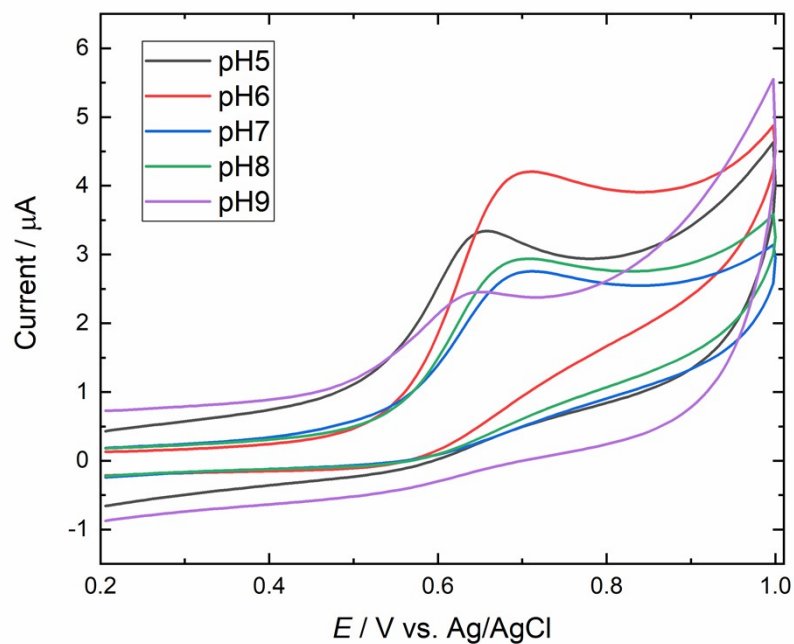

**Fig. S2** CV of Ni/PDDA/rGO/SPCE in 20.0  $\mu\text{M}$   $\text{NaNO}_2$  + 0.1 M PBS different pH at a scan rate of  $50 \text{ mV s}^{-1}$ .

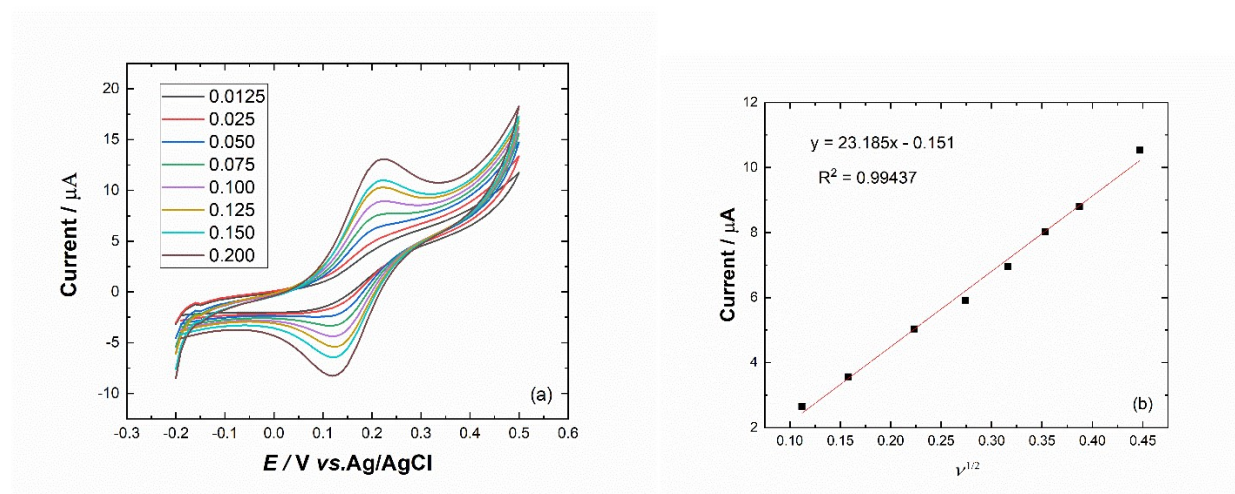

**Fig. S3** (a) CV at various scan rates in a solution of  $5 \text{ mM Fe(CN)}_6^{3-/4-}$  in 0.1 M KCl and (b) anodic peak current ( $I_{pa}$ ) linearly increased with the square root of scan rate ( $\nu^{1/2}$ )

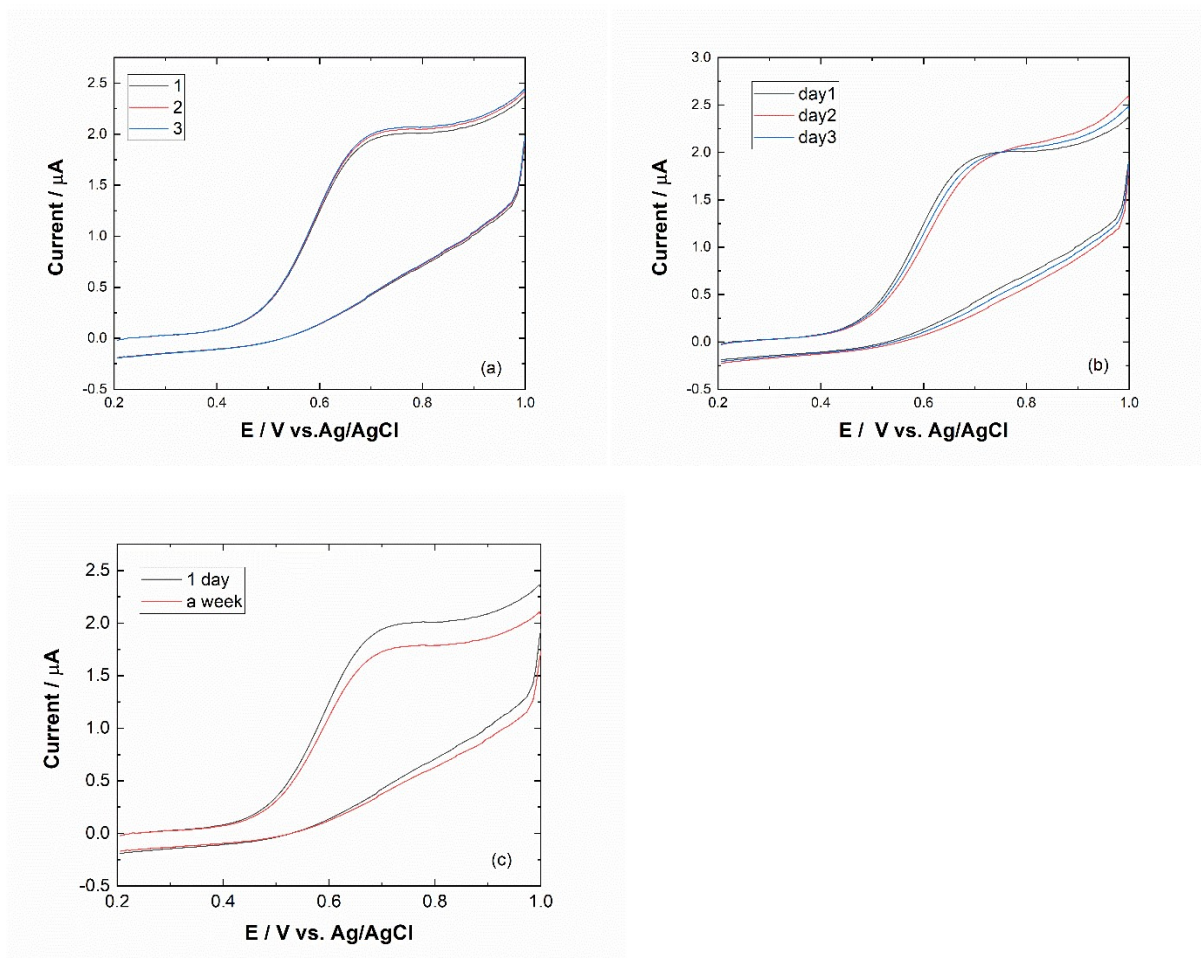

**Fig. S4** CVs of (a) intra-assay, (b) inter-assay precision (RSD) and (c) stability of the Ni/PDDA/rGO/SPCE
